# Supplementary material
Source: PubMed Central journal article supplement (PMC3135741)

## Supplementary Data

**S Figure 1:** (A) Southern blot showing dose-dependent elimination of HPV16 episomes from W12E cells exposed in culture to polyamide 1: (1) 0.1% DMSO, (2) 1uM polyamide 1, (3) 10uM polyamide 1; biotin-labeled molecular weight marker is shown (NEB cat# N7554S); + control is BamHI linearized HPV16 plasmid DNA. (B) Q-PCR showing a typical standard curve derived from input of known HPV16 episome copies (solid diamonds); average episome copies in 20ng (2500 copies/cell) DNA extracted from DMSO-treated W12E cells (open square); 10uM polyamide 1 (open circles) treatment of W12E cells reduces HPV16 episomes to 0-0.25 copies/cell (n=6).

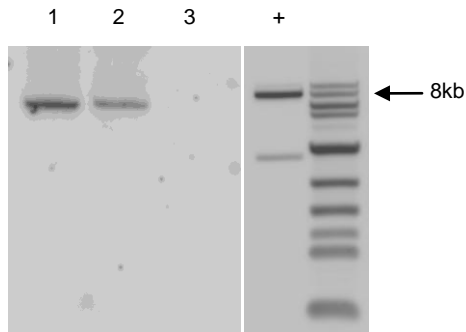

A

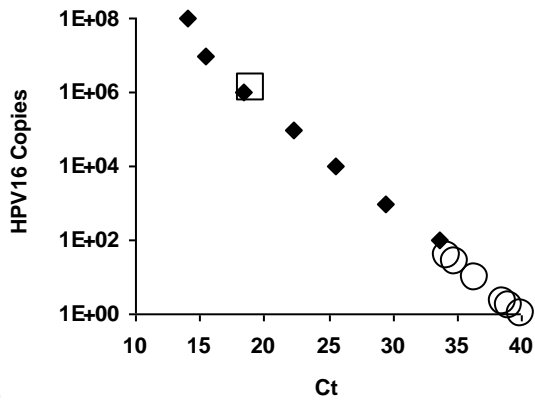

B

**S Figure 2:** Representative sections from figures 4 (W12E rafts; A and B) and 6 (Ker4-18 rafts; C and D) showing immunohistochemical staining for involucrin. Arrows in each figure point to the negative basal cell layer. Suprabasal cell layers stain positive for involucrin. The W12E rafts are dysplastic and poorly organized while the Ker4-18 rafts are well organized, stratified, and highly differentiated. W12E rafts were treated as described with DMSO (A) or DMSO + 100  $\mu$ M polyamide 1 (B). Ker4-18 rafts were treated topically 2X as described with either vehicle (C) or vehicle + 1mM polyamide 25 (D).

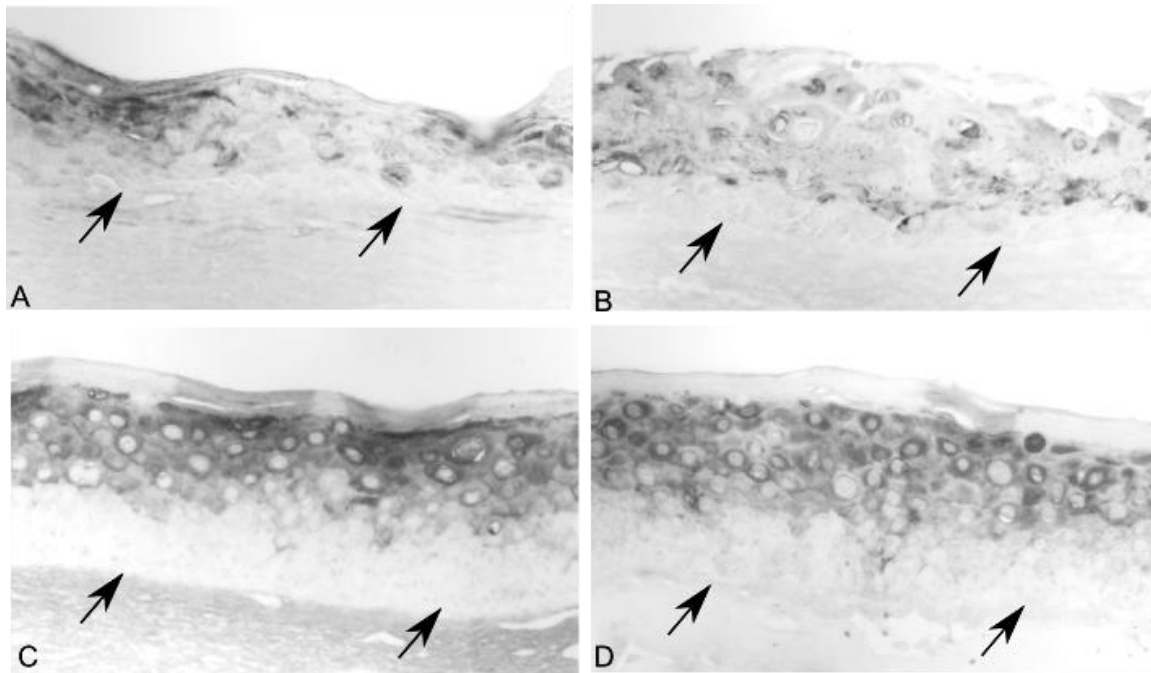

**S Figure 3:** Q-PCR of Ker4-18 rafts described in Fig. 6. 1X treatment with polyamide 25 results in a approximate 70% reduction in HPV18 copy number relative to vehicle treated controls. 2X treatment with polyamide 25 results in a greater than 80% reduction of HPV18 DNA. \*, \*\*:  $p < 0.01$

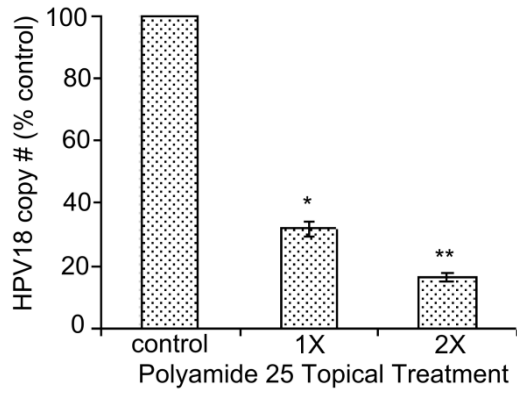

**S Figure 4:** Treatment of W12E (HPV16) rafts (A, B) and Ker4-18 (HPV18) rafts (C, D) with vehicle alone (A, C); polyamide **1** (B); and polyamide **25** (D) as described. Endogenous polyamide fluorescence was used to localize compound following treatment. Note the lack of polyamide-derived nuclear fluorescence in vehicle-treated samples (A, C) while the polyamide-treated samples both exhibit prominent nuclear fluorescence.

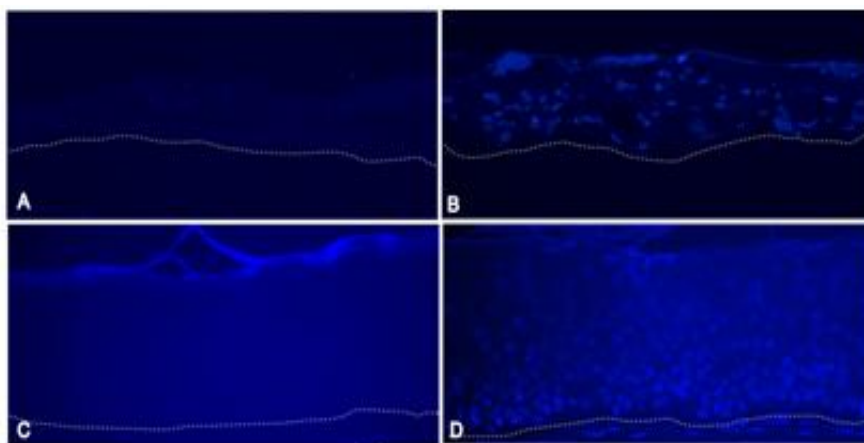

Supplement: NIHMS303235-supplement-01.pdf [file NIHMS303235-supplement-01.pdf]
